# Supplementary material for: The prevalence of high risk of obstructive sleep apnea in patients with psoriasis
Source: Springer Nature journal article supplement (doi:10.1007/s11325-025-03318-y), 2025-04-15
Supplement: MOESM1 [file 11325_2025_3318_MOESM1_ESM.pdf]

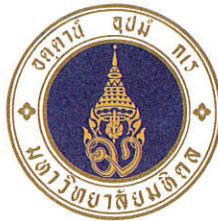

## Siriraj Institutional Review Board

### Certificate of Approval

COA no. Si 122/2023

Protocol Title (English) : The prevalence of high risk of obstructive sleep apnea in patients with psoriasis  
Protocol Title (Thai) : ความชุกของผู้ที่มีความเสี่ยงสูงต่อการเป็นโรคหยุดหายใจขณะหลับจากการอุดกั้นในผู้ป่วยโรคสะเก็ดเงิน  
SIRB Protocol No. : 038/2566(IRB1)  
Principal Investigator/Affiliation : Assoc. Prof. Wish Banhira M.D. / Department of Oto – Rhino – Laryngology  
Research site : Faculty of Medicine Siriraj Hospital  
Duration of research : 1 year  
Approval date : February 13, 2023  
Expired date : February 12, 2024

This is to certify that Siriraj Institutional Review Board is in full compliance with international guidelines for human research protection such as the Declaration of Helsinki, the Belmont Report, CIOMS Guidelines and the International Conference on Harmonization in Good Clinical Practice (ICH-GCP)

  
.....  
(Prof. Naraporn Prayoonwiwat, M.D.)  
Chairperson

15 FEB 2023  
.....  
date

  
.....  
(Prof. Apichat Asavamongkolkul, M.D.)  
Dean of Faculty of Medicine Siriraj Hospital

16 FEB 2023  
.....  
date

#### Approval includes :

1. SIRB submission form, Version 1 date February 10, 2023
2. Participant information sheet, Version 2 date February 10, 2023
3. Informed consent form
4. Case record form
5. STOP-Bang Questionnaire
6. The Epworth Sleepiness Scale (ESS)
7. Instruction for obstructive sleep apnea (OSA)
8. Curriculum vitae
